# Supplementary material for: Soft Polydimethylsiloxane-Supported Lipid Bilayers for Studying T Cell Interactions
Source: PubMed Central journal article supplement (PMC7820804; doi:10.1016/j.bpj.2020.11.021), 2020-11-26
Supplement: mmc1.pdf [file mmc1.pdf]

**Biophysical Journal, Volume 120**

**Supplemental Information**

**Soft Polydimethylsiloxane-Supported Lipid Bilayers for Studying T Cell Interactions**

**Anna H. Lippert, Ivan B. Dimov, Alexander K. Winkel, Jane Humphrey, James McColl, Kevin Y. Chen, Ana M. Santos, Edward Jenkins, Kristian Franze, Simon J. Davis, and David Klenerman**

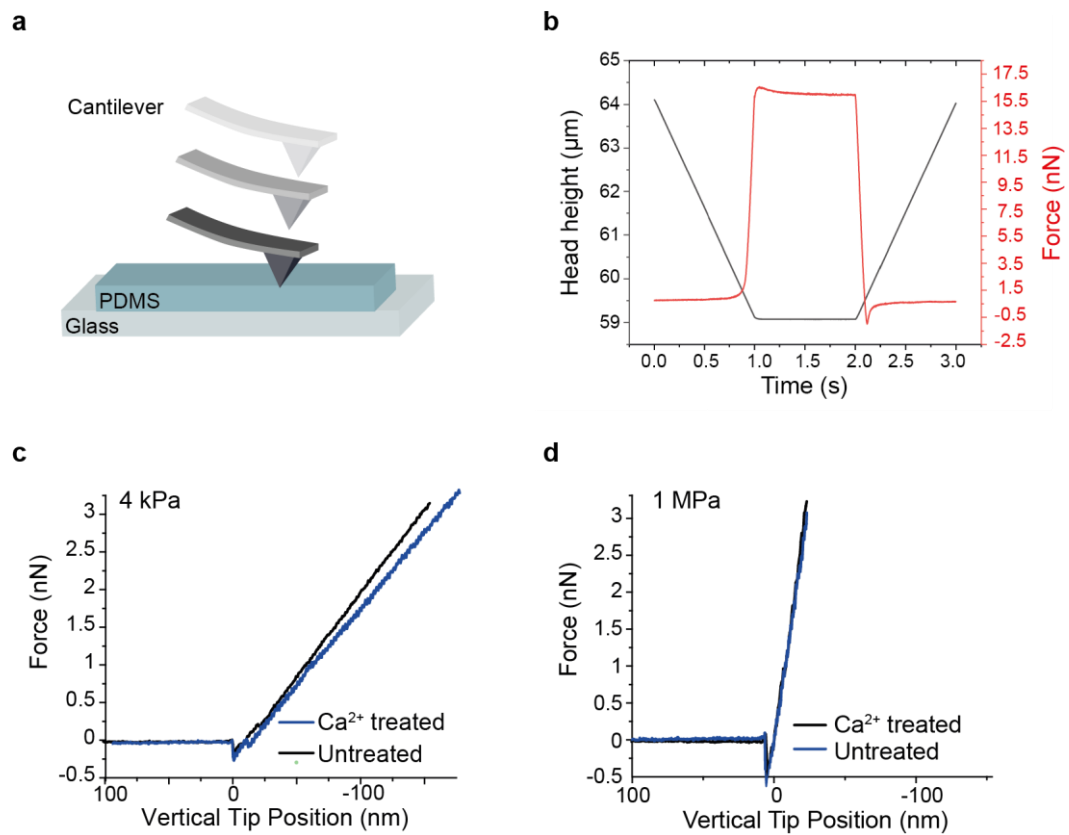

**Suppl. Fig. 1:** PDMS characterisation using AFM. **(a)** Schematic of the experiment. **(b)** Creep response curve of 4 kPa gel, recording the force on the cantilever (red) at constant cantilever head height (black). **(c, d)** Force response of indentation experiments plotting force over vertical tip positions comparing Ca<sup>2+</sup> treated (blue) and untreated (black) 4 kPa **(c)** and 1 MPa **(d)** PDMS gels.

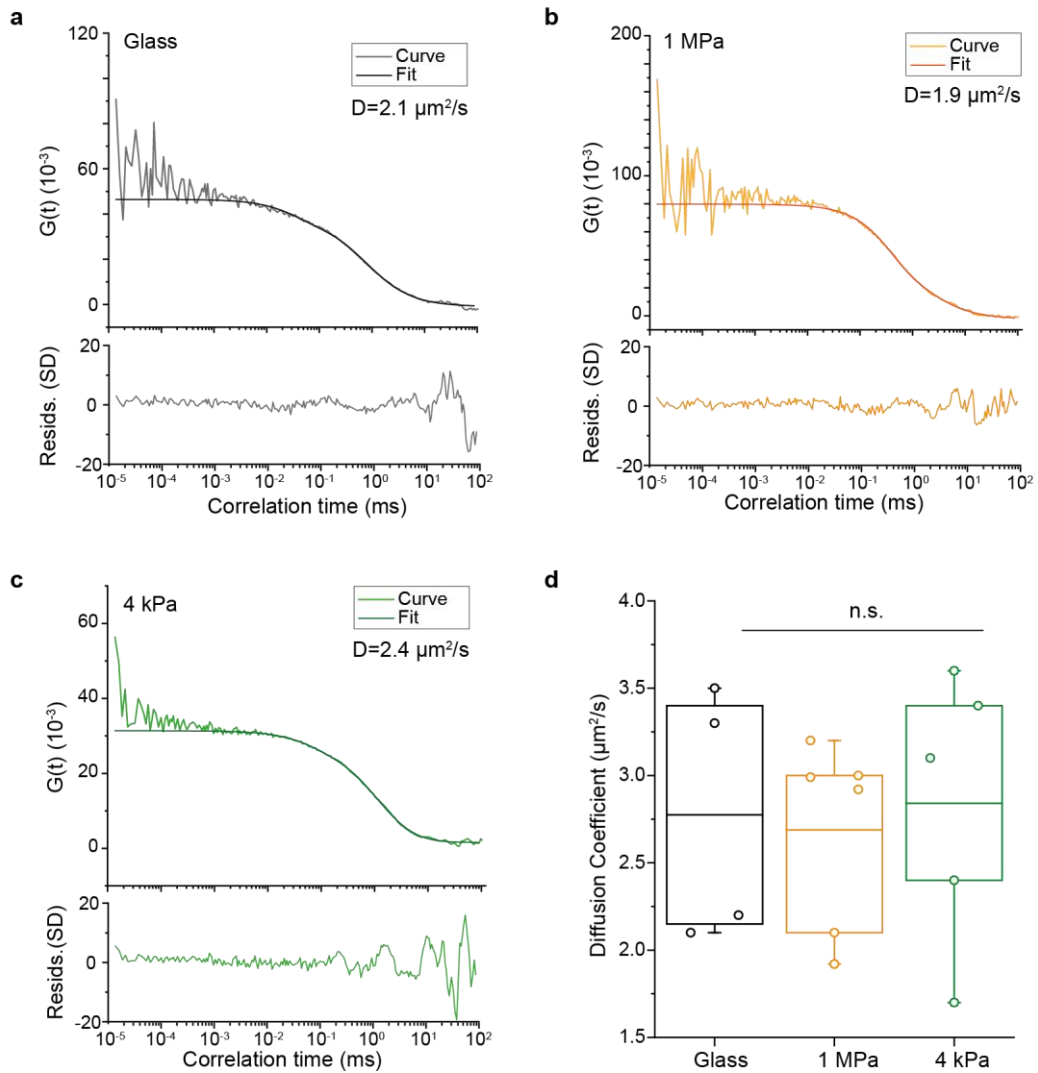

**Suppl. Fig. 2:** FCS measurements of glass- (a), 1 MPa (b) and 4 kPa (c) PDMS-supported bilayers. Shown are representative autocorrelation curves  $G(t)$  and their respective fits as well as a boxplot comparing diffusion coefficients (d). Each data point represents the diffusion coefficient obtained from one bilayer at RT. Boxes indicate the 25% and 75% quartile, the horizontal line the mean, and whiskers the 1.5 IQR. A Mann-Whitney-U test was performed to test for significant differences.

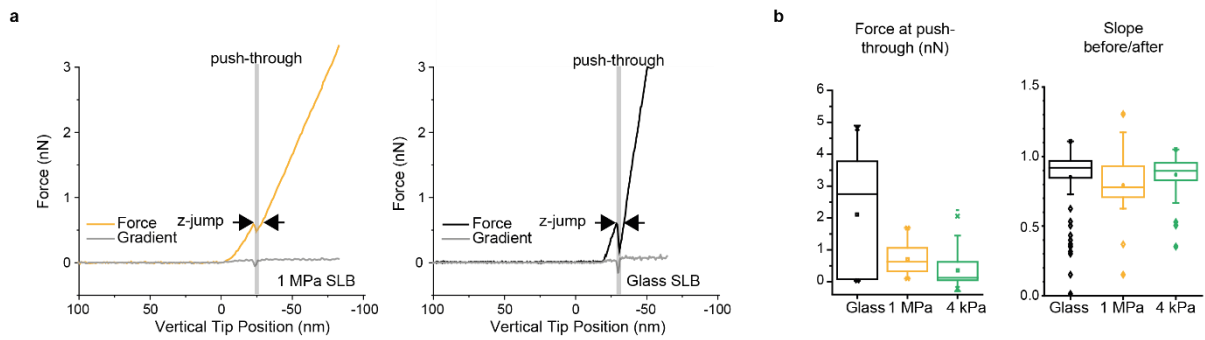

**Suppl. Fig. 3:** AFM-based characterisation of glass-supported and 1 MPa and 4 kPa PDMS-supported lipid bilayers. **(a)** Representative force trace of a cantilever pushing through a 1 MPa (force: orange) and glass supported bilayer (force: black) and gradient of the force (grey). The push-through event is indicated as a "z-jump" (grey area with indicating arrows). **(b)** Boxplots comparing push-through force (left) and slope before/after the push-through (right) (number of force curves analysed: 52 (4 kPa PDMS), 30 (1 MPa PDMS), 31 (glass) from 3 independent experiments). Boxes indicate the 25% and 75% quartile, the square is the mean, the horizontal line the median, the diamonds the outliers and whiskers the 1.5 IQR.

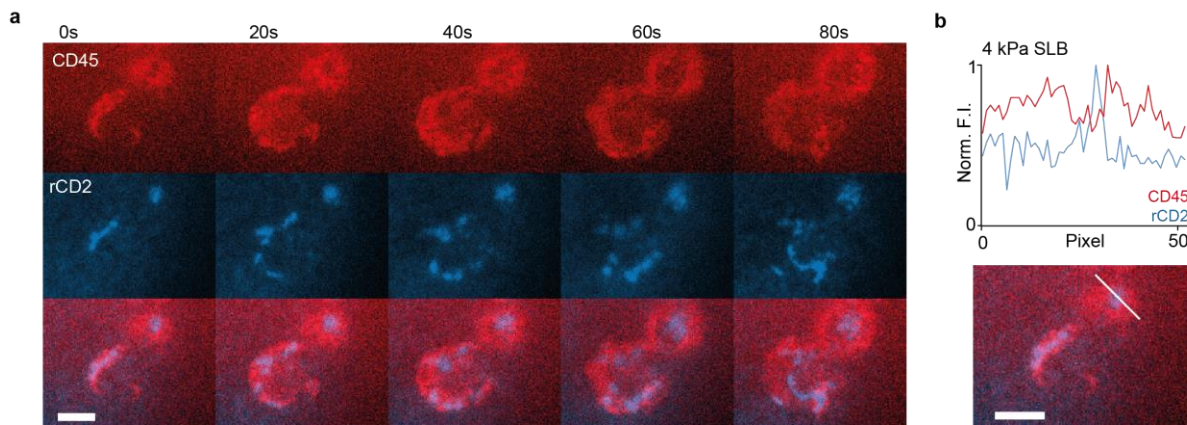

**Suppl. Fig. 4:** Small contacts exclude CD45. **(a)** Representative false-colour two-colour time-lapse TIRF imaging of a T cell recruiting rCD2-Alexa647 (blue) into contacts, alongside exclusion of CD45 labelled with Gap8.3 anti-CD45 antibody Fab tagged with Alexa 488 (red). **(b)** Line profile of CD45 and rCD2 fluorescence at the 0s timepoint. Scale bars 1  $\mu$ m.

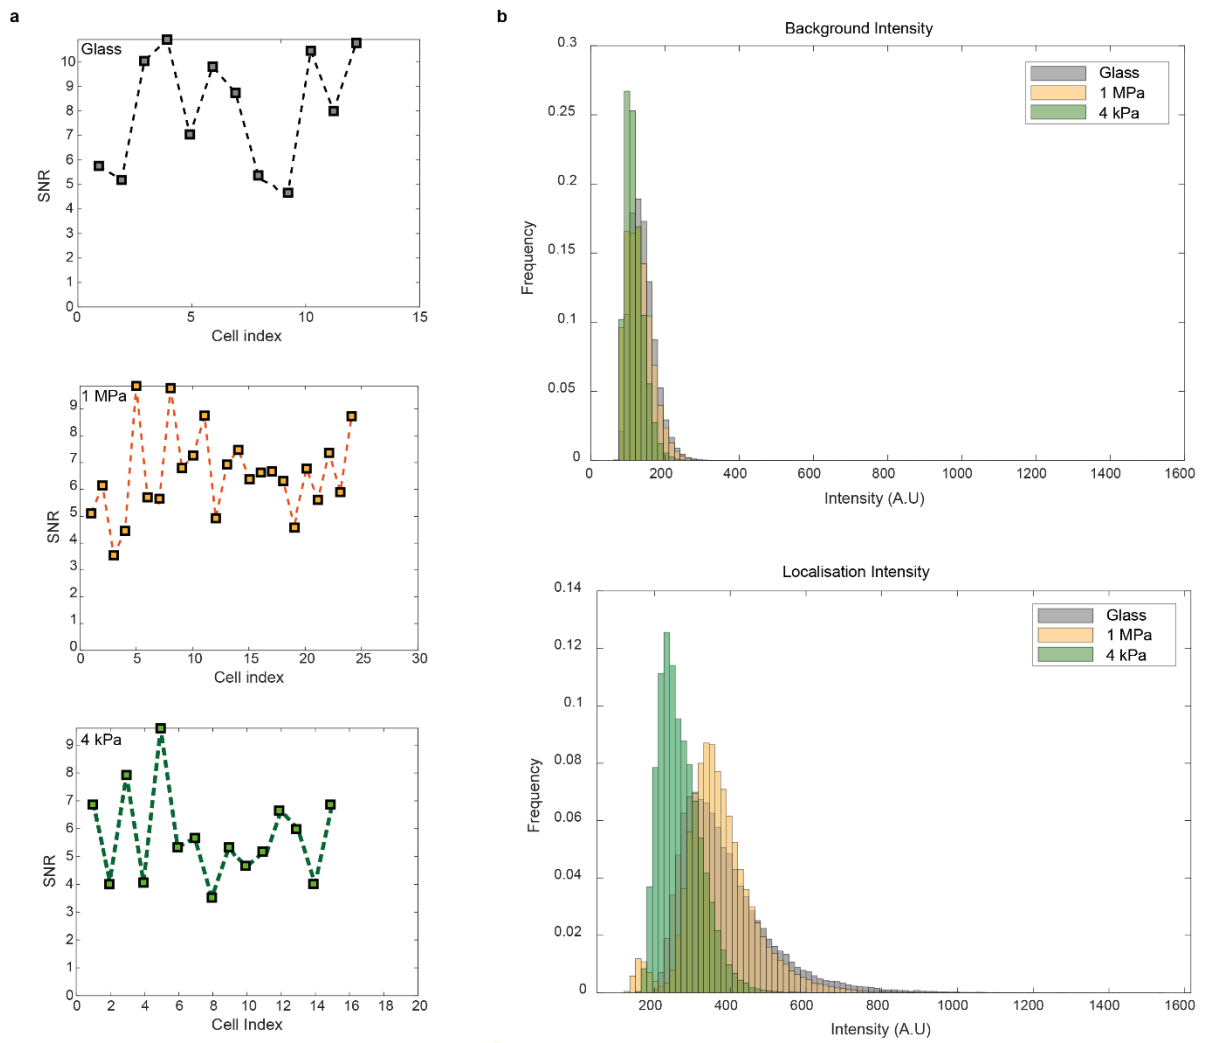

**Suppl. Fig. 5:** Signal-to-noise (SNR) ratios of UCHT-1 Alexa488 diffusion data shown as SNR cell by cell (**a**) and as histograms of overall background (**b**, top) and localisation intensities (**b**, bottom).

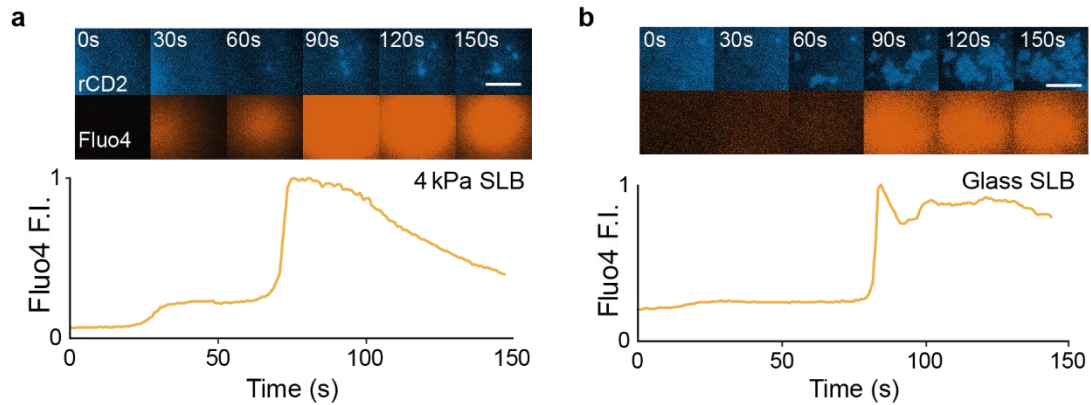

**Suppl. Fig. 6:** Small rCD2 contacts exclude CD45 and produce calcium responses on 4 kPa PDMS-supported bilayers. Jurkat cells expressing rCD48 were loaded with Fluo-4 and allowed to settle onto Alexa647-tagged rCD2-presenting 4 kPa PDMS (a) and glass (b) supported bilayers. Two colour illumination with a 488 laser set to epi illumination and a 647 laser set to TIRF illumination allowed simultaneous detection of rCD2 accumulation and calcium signaling. The Fluo4 signal, as raw images and traces (orange) are shown under the time-lapse TIRF images. Scale bars 5  $\mu$ m.

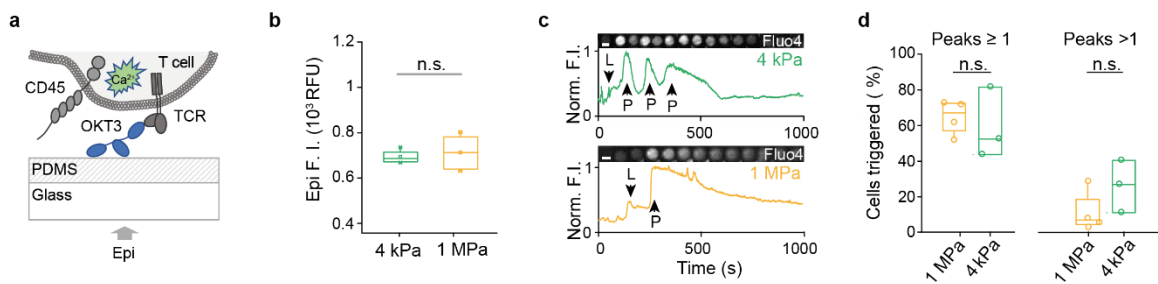

**Suppl. Fig. 7:** Calcium responses of T cells on PDMS coated with activating OKT3 anti-CD3 $\epsilon$  antibody. (a) Schematic of the experiment. T cells were preloaded with Fluo-4 prior to imaging their calcium responses on OKT3-coated PDMS. (b) PDMS gel stiffness did not influence antibody loading at the concentration used (10  $\mu$ g/ml). Gels were incubated with fluorescently labelled antibody overnight, washed and the fluorescence intensity measured using epi-illumination. A two-sided t-test was used for statistical analysis. (c) Example calcium signaling traces for cells contacting OKT3 antibody-coated 4 kPa and 1 MPa PDMS gels; L, cell landing, P, calcium peaks. Fluo4 fluorescence is shown above the trace. Scale bar 10  $\mu$ m. (d) Fraction of cells exhibiting a calcium response (peak  $\geq$  1) and fraction of responding cells that displayed multiple peaks (peaks  $>$  1). Each data point in the boxplot represents a single experiment with  $n_{\text{cells}} > 50$ . All experiments were performed at 37 $^{\circ}$ C. The Mann-Whitney U test was used for statistical analysis.
